# Supplementary material for: Syringe purification with UPLC-MS/MS for detection of antibiotics in tea garden soil after long-term application of manure
Source: Royal Society of Chemistry journal article supplement (doi:10.1039/d2ay00885h), 2022-01-01

**Table S1 MS/MS parameters on the parent and quantitative daughter ion(m/z) and collision energy of antibiotics**

| antibiotics  | Name                   | Parent ion (m/z) | Daughter ion (m/z) | Collision energy (eV) | Decluster ring potential (eV) | IS |
|--------------|------------------------|------------------|--------------------|-----------------------|-------------------------------|----|
|              | Sulfadiazine           | 251              | 156 <sup>a</sup>   | 23                    | 65                            |    |
|              |                        |                  | 108                | 34                    |                               |    |
|              | Sulfathiazole          | 256              | 156 <sup>a</sup>   | 22                    | 63                            |    |
|              |                        |                  | 108                | 32                    |                               |    |
|              | Sulfapyridine          | 250              | 156 <sup>a</sup>   | 25                    | 65                            |    |
|              |                        |                  | 184                | 25                    |                               |    |
|              | Sulfamerazine          | 265              | 156 <sup>a</sup>   | 25                    | 82                            |    |
|              |                        |                  | 172                | 25                    |                               |    |
|              | Sulfameter             | 281              | 156 <sup>a</sup>   | 27                    | 90                            |    |
|              |                        |                  | 108                | 42                    |                               |    |
| Sulfonamides | Sulfamethizole         | 271              | 156 <sup>a</sup>   | 21                    | 60                            |    |
|              |                        |                  | 108                | 33                    |                               |    |
|              | Sulfamethazine         | 279              | 186 <sup>a</sup>   | 27                    | 90                            |    |
|              |                        |                  | 108                | 27                    |                               |    |
|              | Sulfamethoxypyridazine | 281              | 156 <sup>a</sup>   | 25                    | 95                            |    |
|              |                        |                  | 108                | 45                    |                               |    |
|              | Sulfachloropyridazine  | 285              | 156 <sup>a</sup>   | 22                    | 60                            |    |
|              |                        |                  | 108                | 34                    |                               |    |
|              | Sulfamethoxazole       | 254              | 156 <sup>a</sup>   | 24                    | 85                            |    |
|              |                        |                  | 108                | 37                    |                               |    |
|              | Sulfadoxine            | 311              | 156 <sup>a</sup>   | 26                    | 73                            |    |
|              |                        |                  | 108                | 37                    |                               |    |
|              | Sulfamonomethoxine     | 281              | 156 <sup>a</sup>   | 26                    | 87                            |    |

| antibiotics     | Name                     | Parent ion<br>(m/z) | Daugh<br>ter ion<br>(m/z) | Collision<br>energy<br>(eV) | Decluste<br>ring<br>potential<br>(eV) | IS                        |
|-----------------|--------------------------|---------------------|---------------------------|-----------------------------|---------------------------------------|---------------------------|
|                 |                          |                     | 108                       | 38                          |                                       |                           |
|                 | Sulfisoxazole            | 268                 | 156 <sup>a</sup>          | 25                          | 82                                    |                           |
|                 |                          |                     | 113                       | 22                          |                                       |                           |
|                 | Sulfadimethoxypyrimidine | 311                 | 156 <sup>a</sup>          | 31                          | 80                                    |                           |
|                 |                          |                     | 108                       | 38                          |                                       |                           |
|                 | Sulfaphenazole           | 315                 | 156.0 <sup>a</sup>        | 29                          | 85                                    |                           |
|                 |                          |                     | 160.1                     | 31                          |                                       |                           |
|                 | Spiramycin               | 844                 | 174 <sup>a</sup>          | 44                          | 100                                   |                           |
|                 |                          |                     | 142                       | 40                          |                                       |                           |
|                 | Tilmicosin               | 870                 | 697 <sup>a</sup>          | 52                          | 130                                   |                           |
|                 |                          |                     | 174                       | 52                          |                                       |                           |
|                 | Oleandomycin             | 688                 | 158 <sup>a</sup>          | 31                          | 65                                    |                           |
|                 |                          |                     | 545                       | 23                          |                                       |                           |
|                 | Tylosin                  | 917                 | 174 <sup>a</sup>          | 46                          | 60                                    |                           |
|                 |                          |                     | 773                       | 40                          |                                       |                           |
| macrolides      | Kitasamycin              | 773                 | 174 <sup>a</sup>          | 40                          | 60                                    |                           |
|                 |                          |                     | 109                       | 40                          |                                       |                           |
|                 | Erythromycin             | 735                 | 576 <sup>a</sup>          | 25                          | 45                                    |                           |
|                 |                          |                     | 158                       | 25                          |                                       |                           |
|                 | Josamycin                | 828                 | 174 <sup>a</sup>          | 42                          | 130                                   |                           |
|                 |                          |                     | 109                       | 45                          |                                       |                           |
|                 | Roxithromycin            | 838                 | 680 <sup>a</sup>          | 30                          | 45                                    |                           |
|                 |                          |                     | 158                       | 40                          |                                       |                           |
|                 | Dimetridazole            | 142                 | 96 <sup>a</sup>           | 21                          | 40                                    | D <sub>3</sub> -DMZ       |
|                 |                          |                     | 81                        | 32                          |                                       |                           |
| nitroimidazoles | Ipronidazole             | 170.2               | 124 <sup>a</sup>          | 25                          | 50                                    | D <sub>3</sub> -<br>IPZOH |
|                 |                          |                     | 108.9                     | 32                          |                                       |                           |

| antibiotics          | Name                            | Parent ion<br>(m/z) | Daughter ion<br>(m/z)                       | Collision<br>energy<br>(eV) | Decluster<br>ring<br>potential<br>(eV) | IS                  |
|----------------------|---------------------------------|---------------------|---------------------------------------------|-----------------------------|----------------------------------------|---------------------|
|                      | Ipronidazole-OH                 | 186                 | 168 <sup>a</sup><br>122                     | 19<br>29                    | 40                                     |                     |
|                      | Metronidazole                   | 172                 | 128 <sup>a</sup><br>82                      | 20<br>31                    | 50                                     | D <sub>3</sub> -DMZ |
|                      | Metronidazole-OH                | 188                 | 123 <sup>a</sup><br>126<br>140 <sup>a</sup> | 14<br>16<br>16              | 55                                     | D <sub>3</sub> -DMZ |
|                      | Ronidazole                      | 201                 | 55                                          | 29                          | 40                                     |                     |
|                      | Chloramphenicol                 | 321                 | 152 <sup>a</sup><br>257                     | -22<br>-16                  | -20                                    | D <sub>5</sub> -CAP |
| Chlorampheni<br>cols | Thiamphenicol                   | 354                 | 185 <sup>a</sup><br>290                     | -28<br>-18                  | -20                                    |                     |
|                      | Florfenicol                     | 356                 | 336 <sup>a</sup><br>185                     | -14<br>-27                  | -20                                    |                     |
|                      | D <sub>3</sub> -Dimetridazole   | 145                 | 99 <sup>a</sup>                             | 22                          | 40                                     |                     |
| IS                   | D <sub>3</sub> -Ipronidazole    | 189                 | 171 <sup>a</sup>                            | 19                          | 35                                     |                     |
|                      | D <sub>5</sub> -Chloramphenicol | 326                 | 157 <sup>a</sup>                            | -21                         | -20                                    |                     |

<sup>a</sup>Quantitative ion

Fig S1. The influence of the amounts of C18 on the extraction efficiency

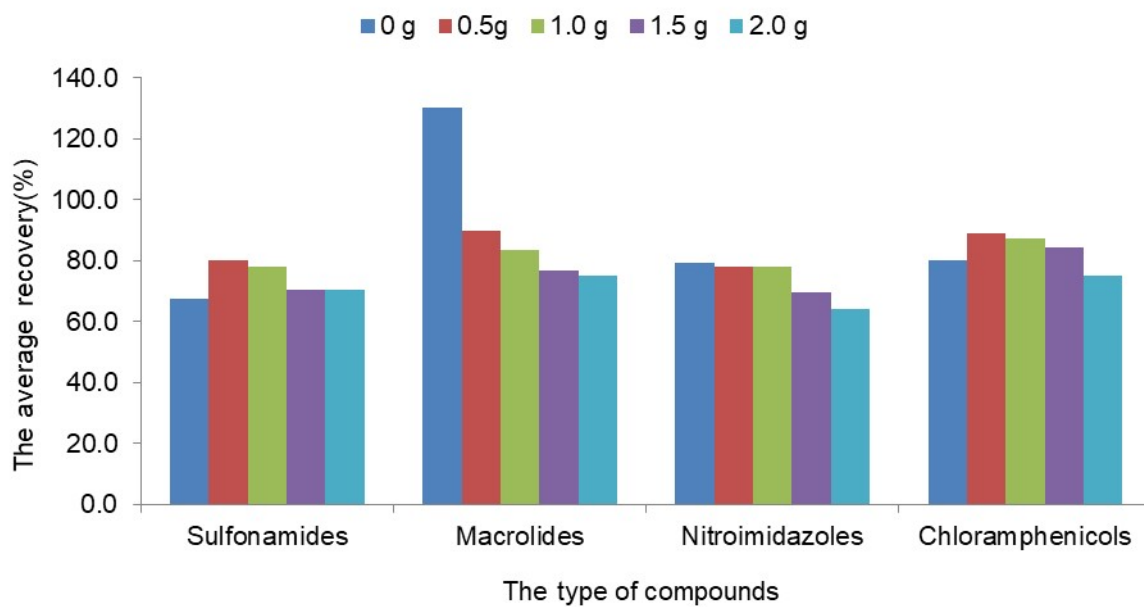

Supplement: d2ay00885h1.pdf [file d2ay00885h1.pdf]
